# Supplementary material for: Sex-Specific Metabolic Effects of Dietary Folate Withdrawal in Wild-Type and Aldh1l1 Knockout Mice
Source: MDPI journal article supplement (doi:10.3390/metabo12050454), 2022-05-18

Supplementary Figure S4

Sex, genotype, and diet

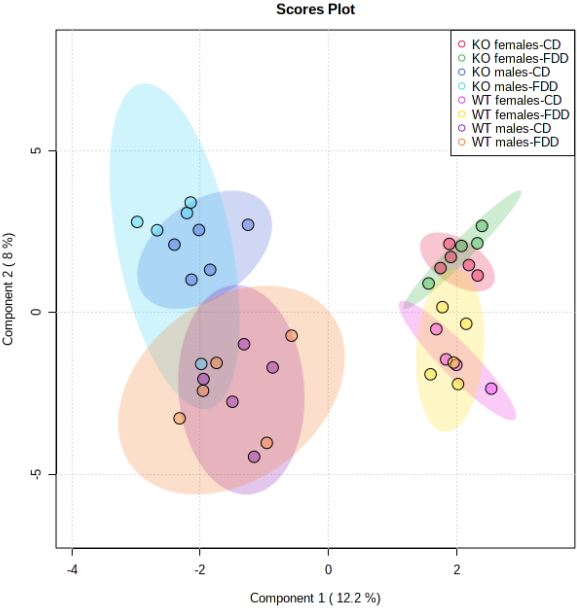

Male v female

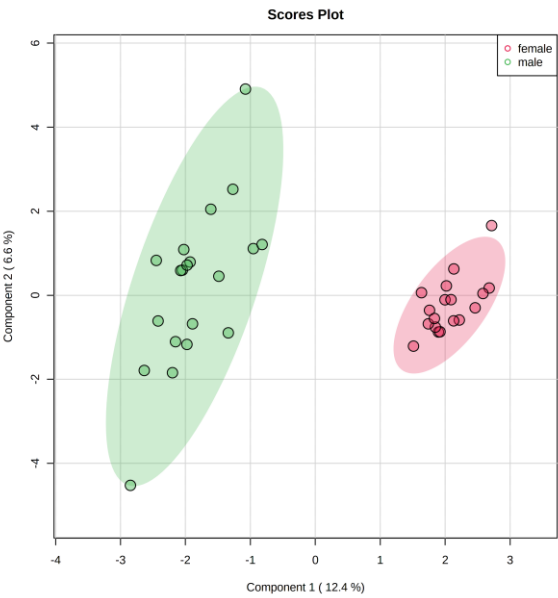

WT v KO

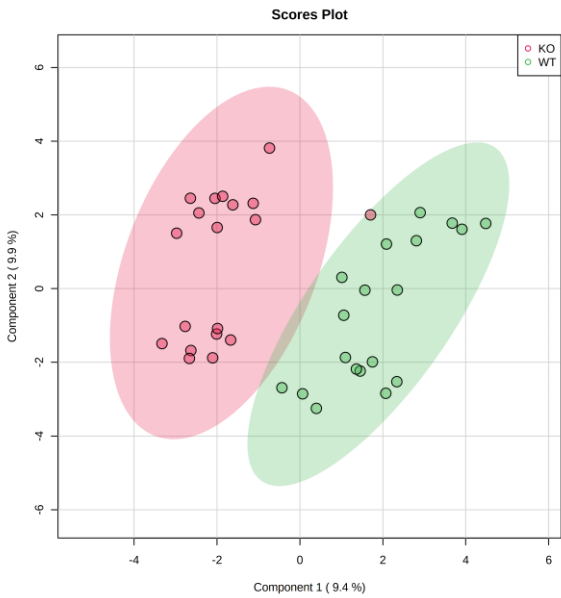

CD v FDD

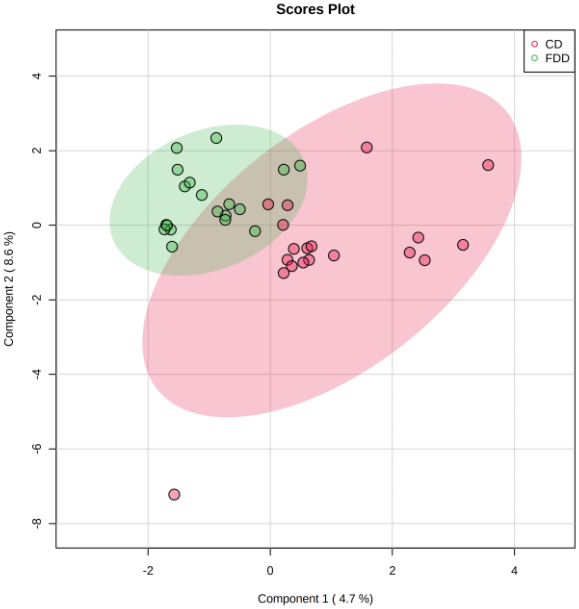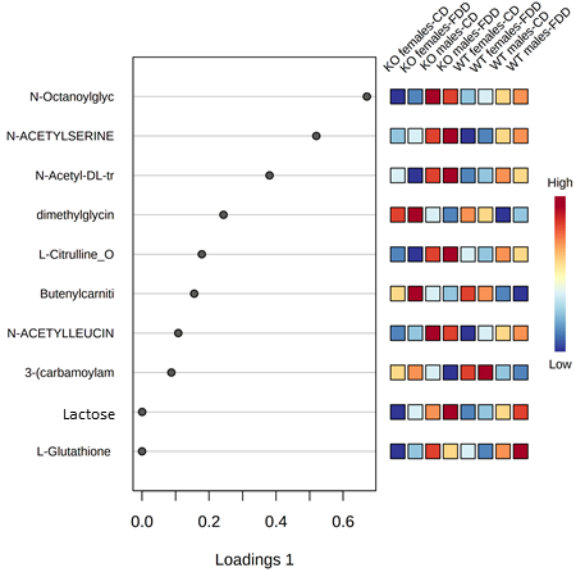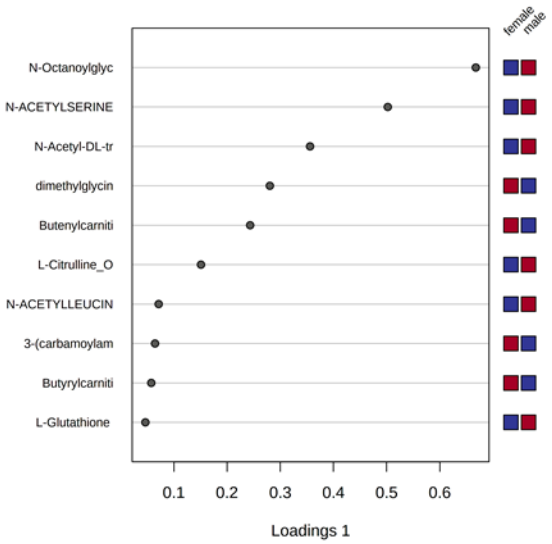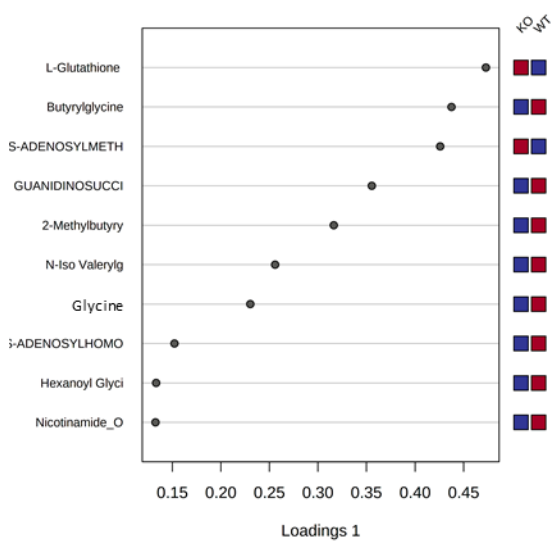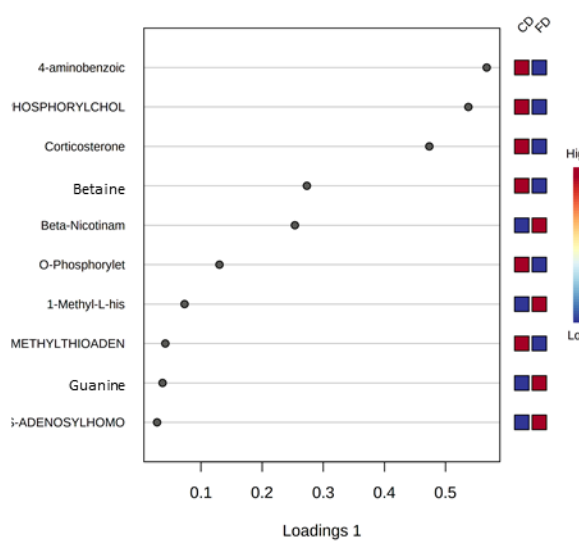

Supplementary Figure S5

All peaks

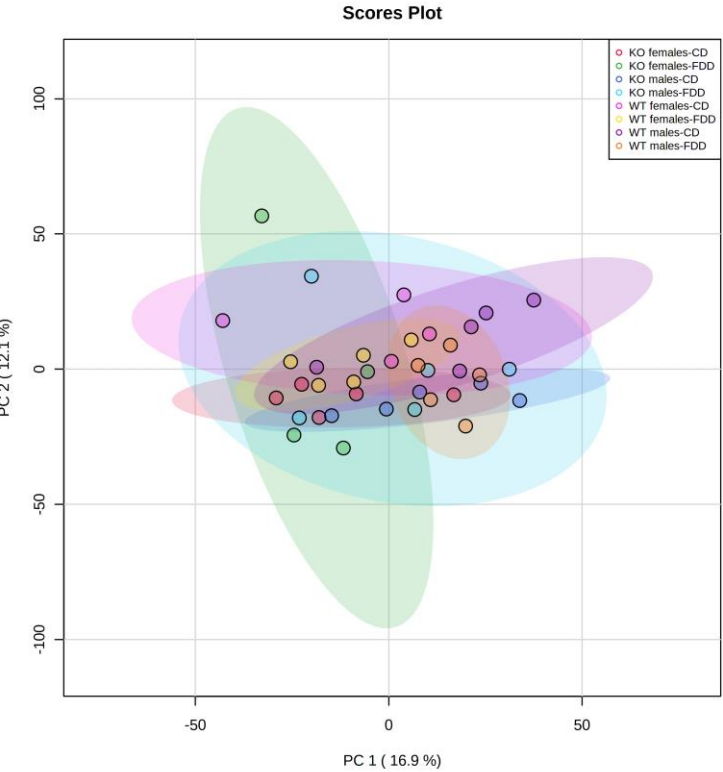

Identified Metabolites (OL1/OL2a)

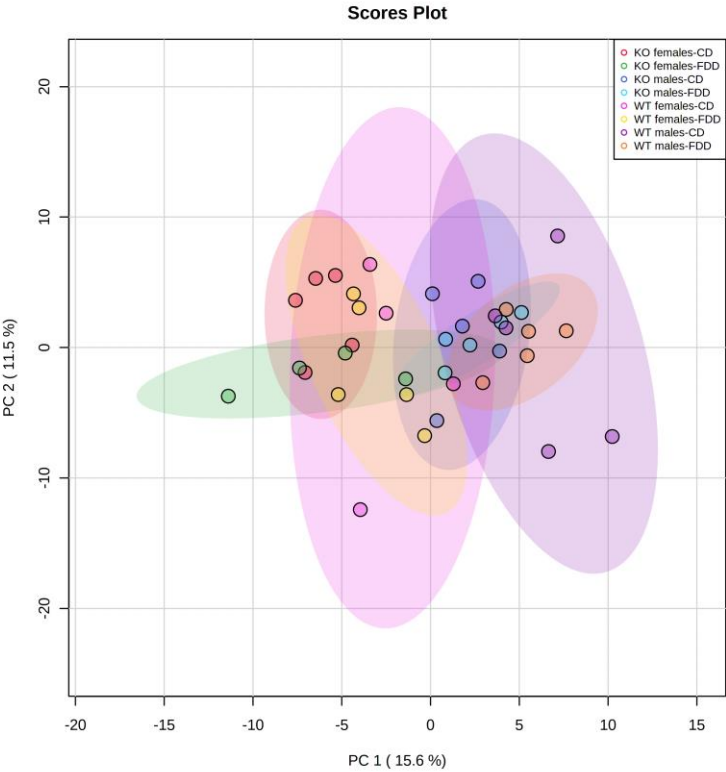

sPLS-DA selected metabolites

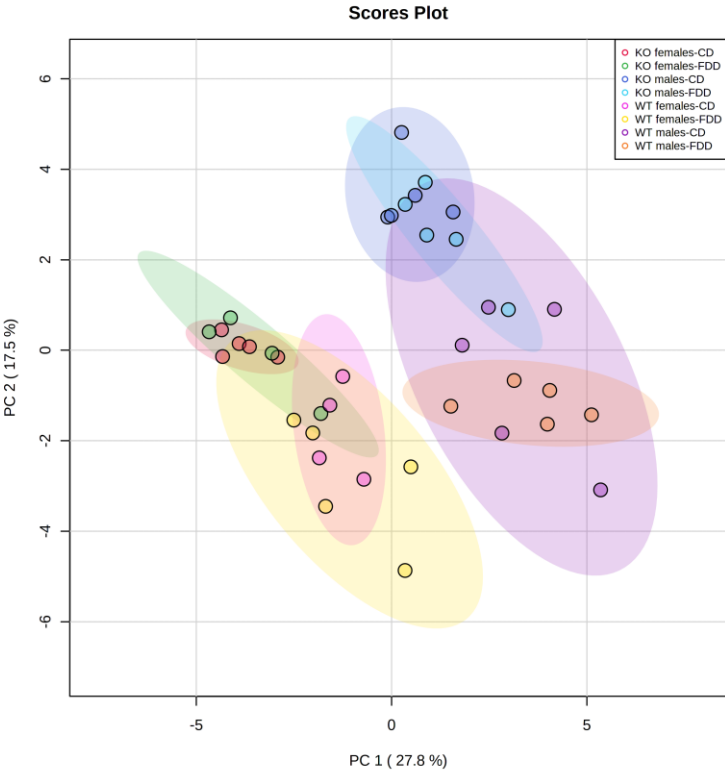

## Supplementary Figure S6

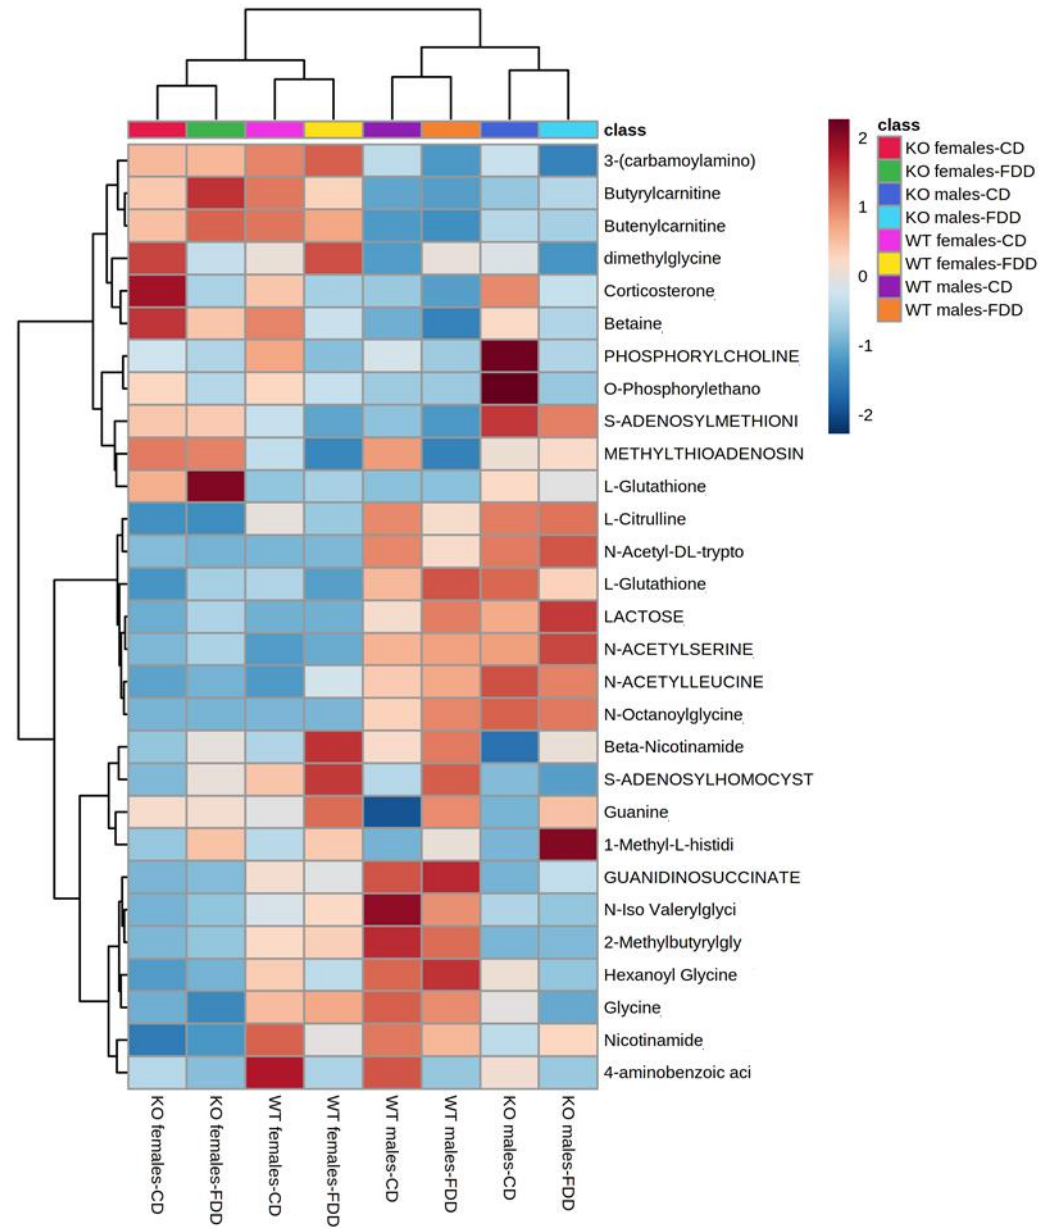

Supplementary Figure S7

Sex, genotype, and diet

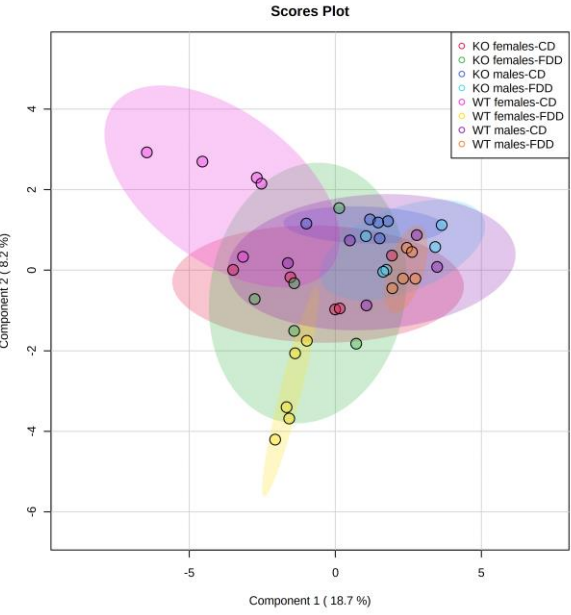

Male v female

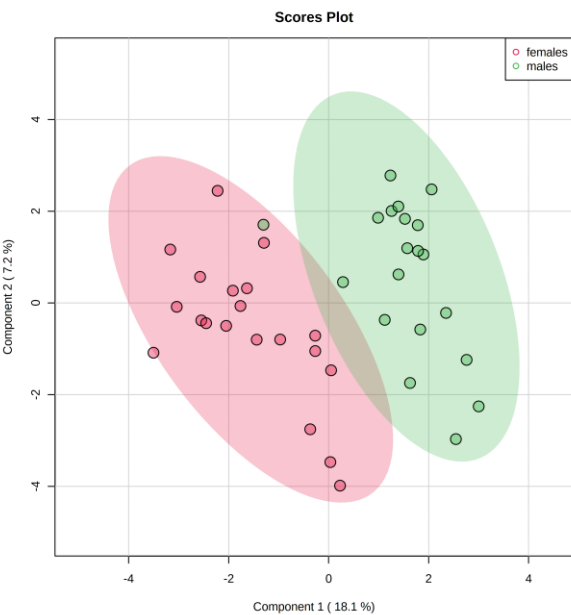

WT v KO

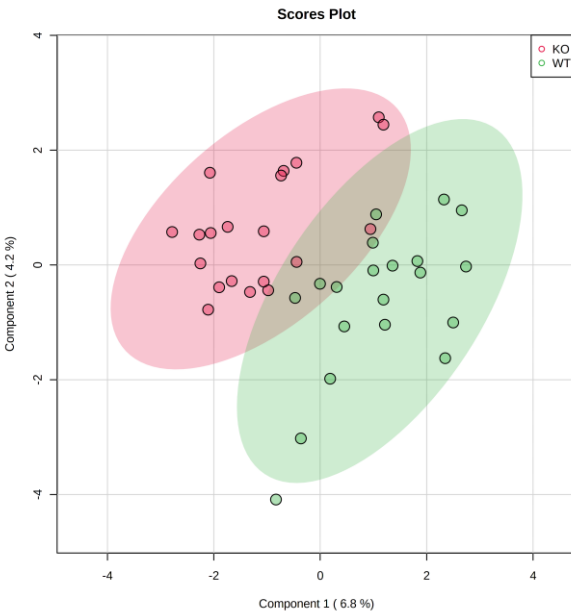

CD v FDD

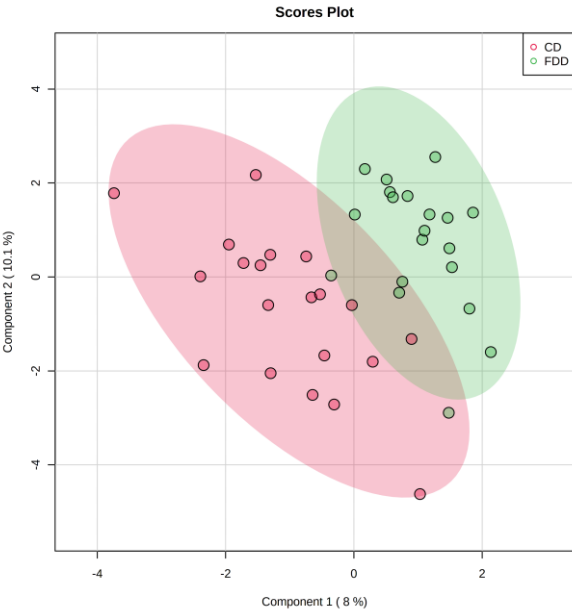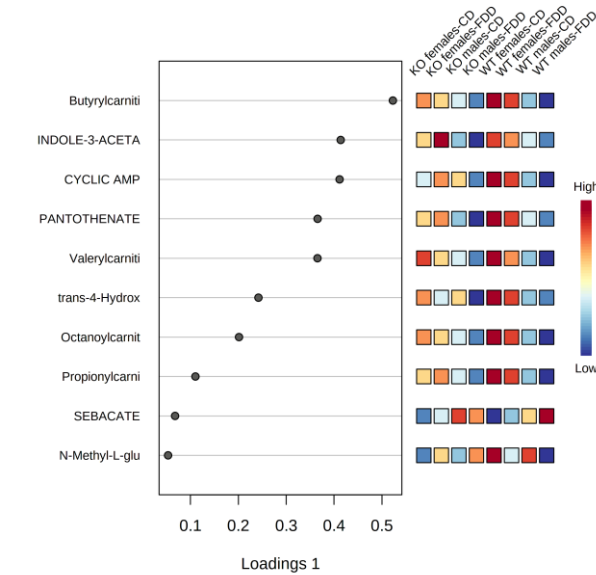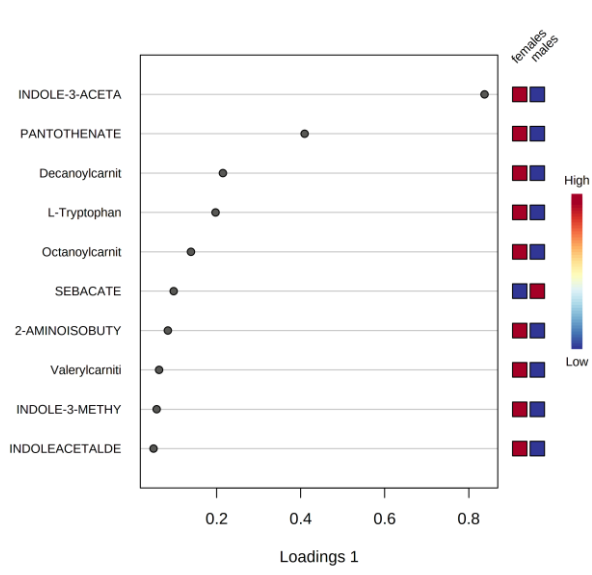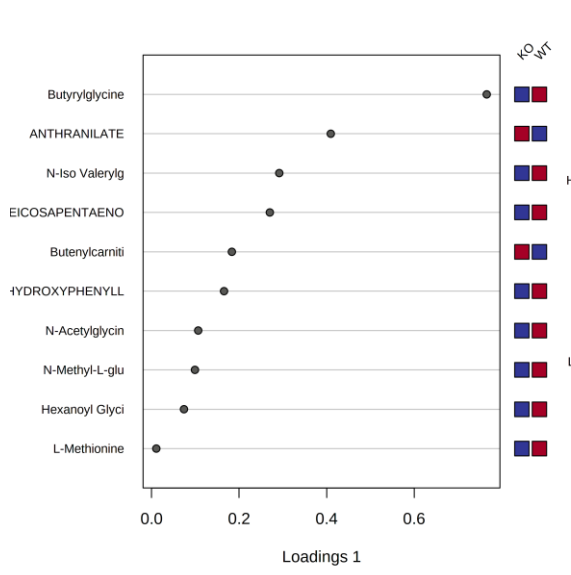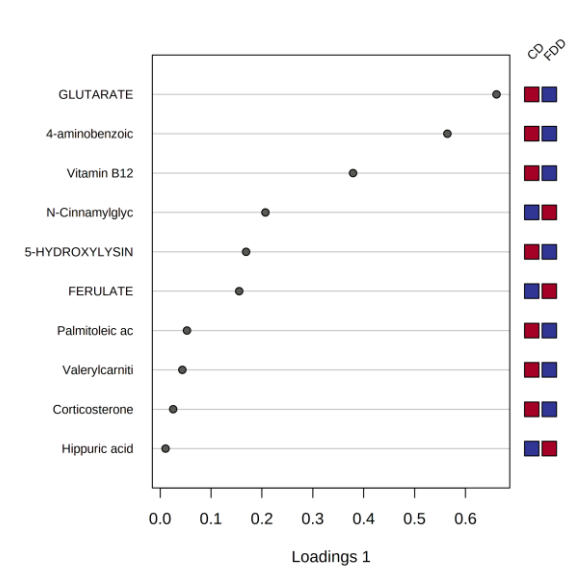

Supplementary Figure S8

All peaks

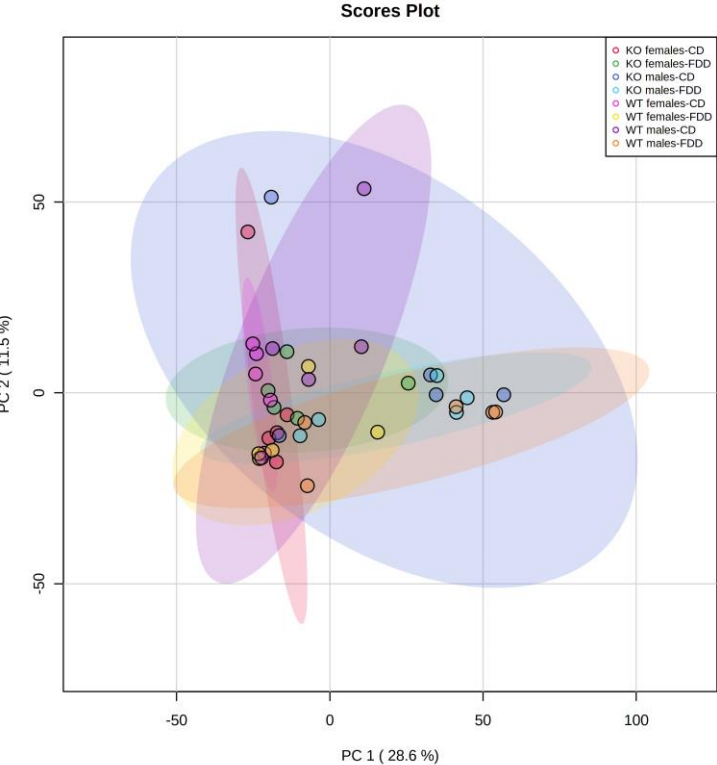

Identified Metabolites (OL1/OL2a)

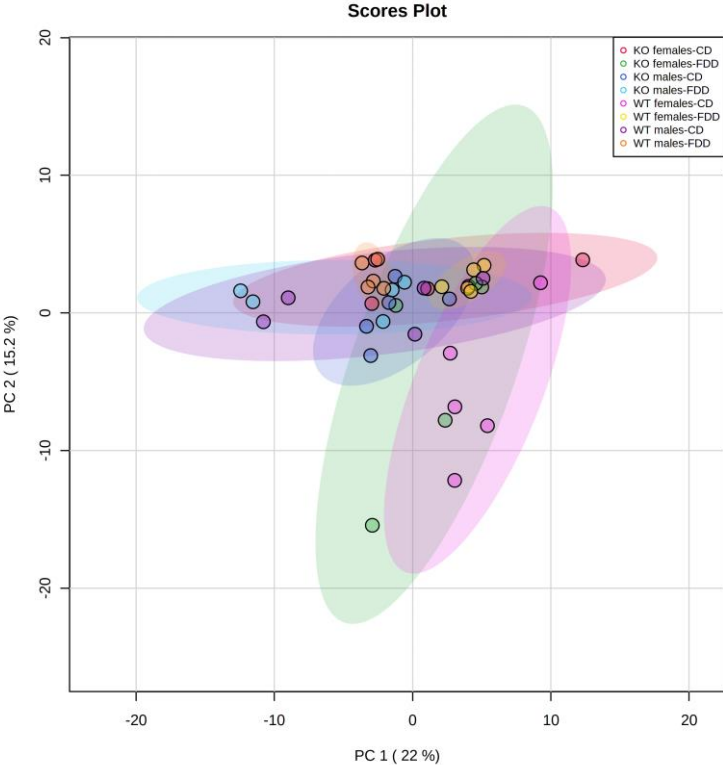

sPLS-DA selected metabolites

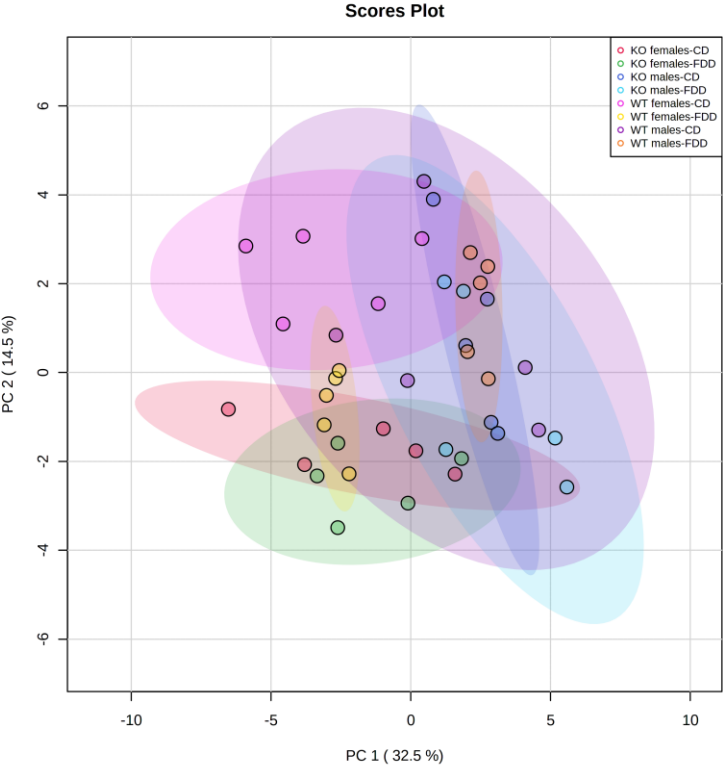

Supplementary Figure S9

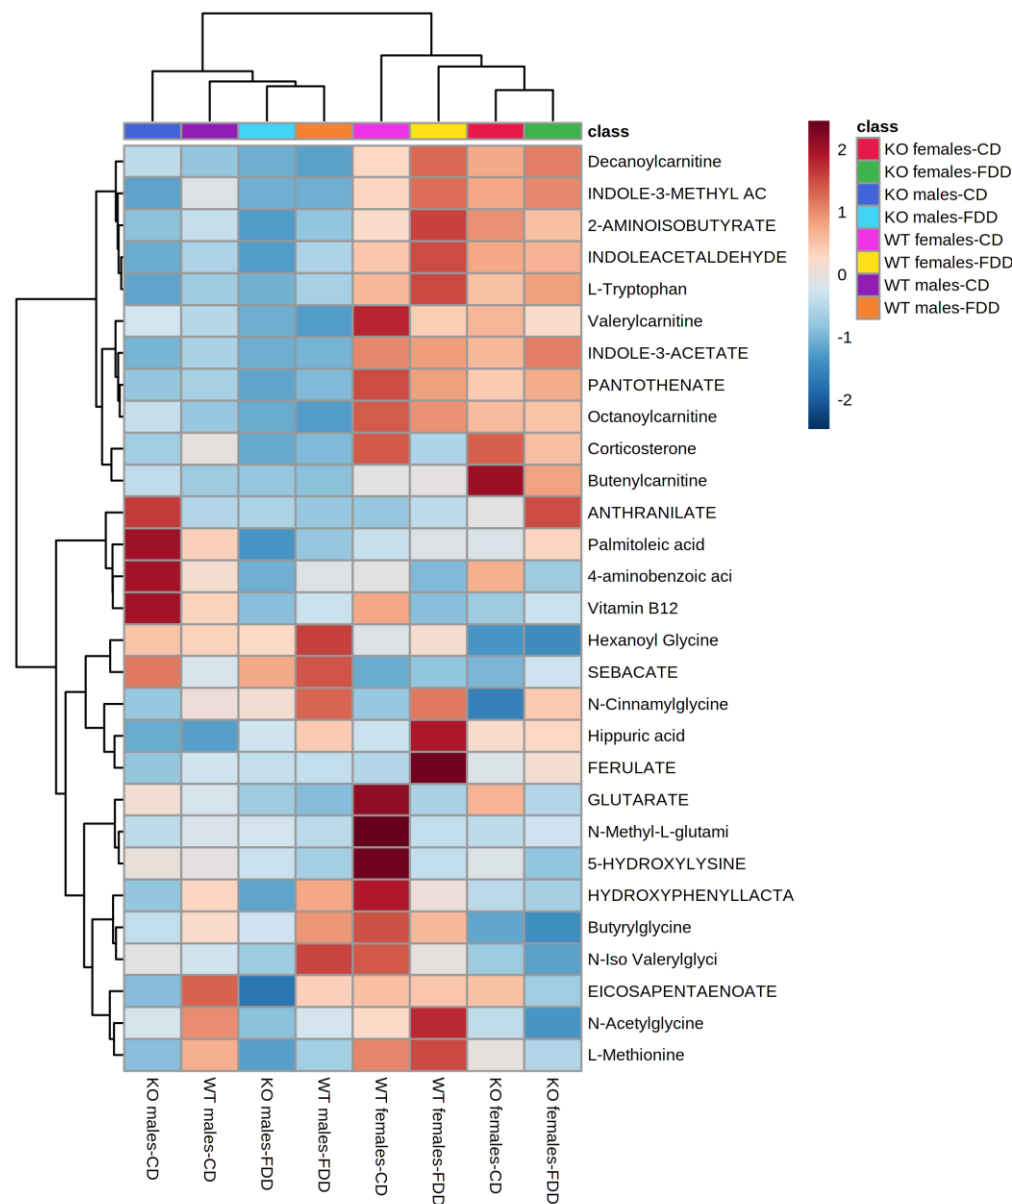

Supplement: s1 [file s1]
