# Supplementary material for: Sex-Specific Metabolic Effects of Dietary Folate Withdrawal in Wild-Type and Aldh1l1 Knockout Mice
Source: MDPI journal article supplement (doi:10.3390/metabo12050454), 2022-05-18
Supplement: s1 [file s1]

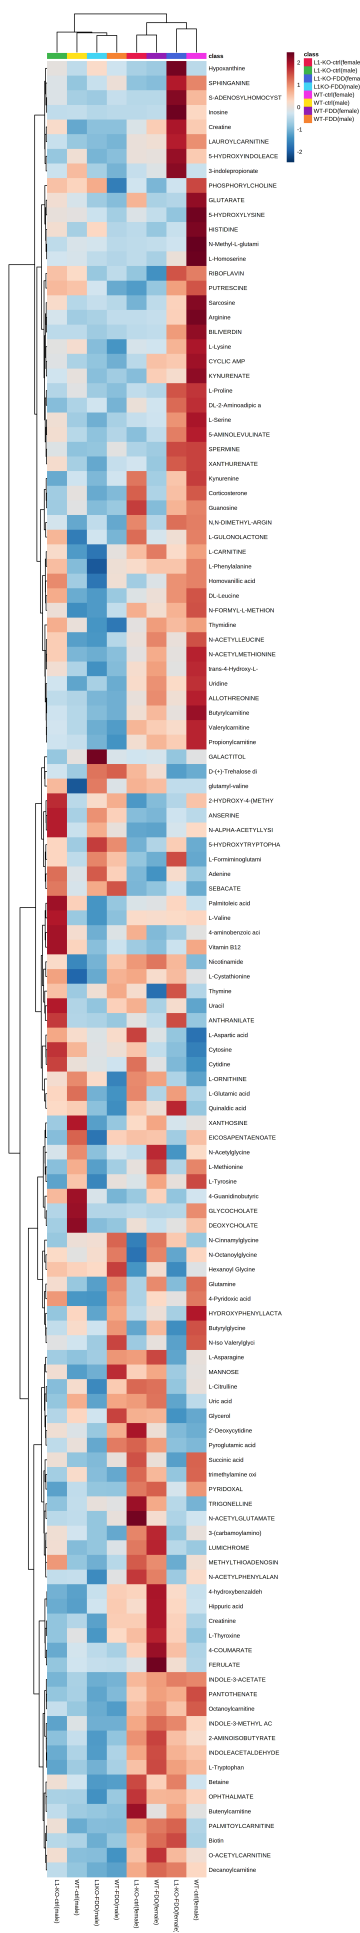

class

Sample 1

Sample 2

Sample 3

Sample 4

Sample 5

Sample 6

Sample 7

Sample 8

Sample 9

Sample 10

Sample 11

Sample 12

Sample 13

Sample 14

Sample 15

Sample 16

Sample 17

Sample 18

Sample 19

Sample 20

Sample 21

Sample 22

Sample 23

Sample 24

Sample 25

Sample 26

Sample 27

Sample 28

Sample 29

Sample 30

Sample 31

Sample 32

Sample 33

Sample 34

Sample 35

Sample 36

Sample 37

Sample 38

Sample 39

Sample 40

Sample 41

Sample 42

Sample 43

Sample 44

Sample 45

Sample 46
