# Supplementary material for: Sex-Specific Metabolic Effects of Dietary Folate Withdrawal in Wild-Type and Aldh1l1 Knockout Mice
Source: MDPI journal article supplement (doi:10.3390/metabo12050454), 2022-05-18
Supplement: s1 [file s1]

Supplemental Figure S1

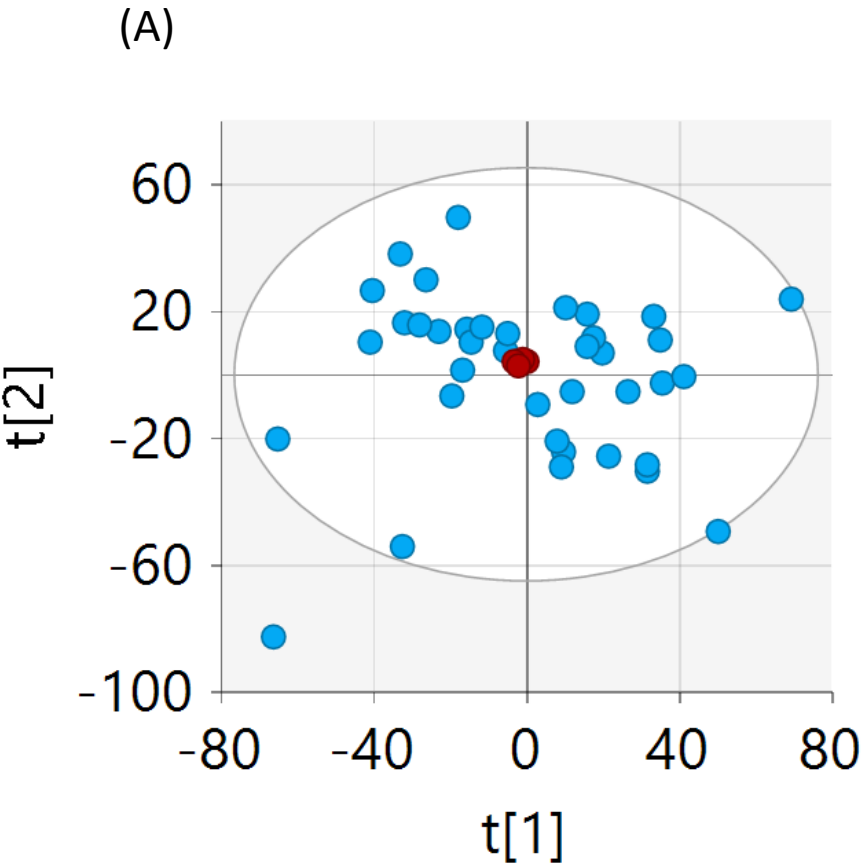

R2X: 0.604

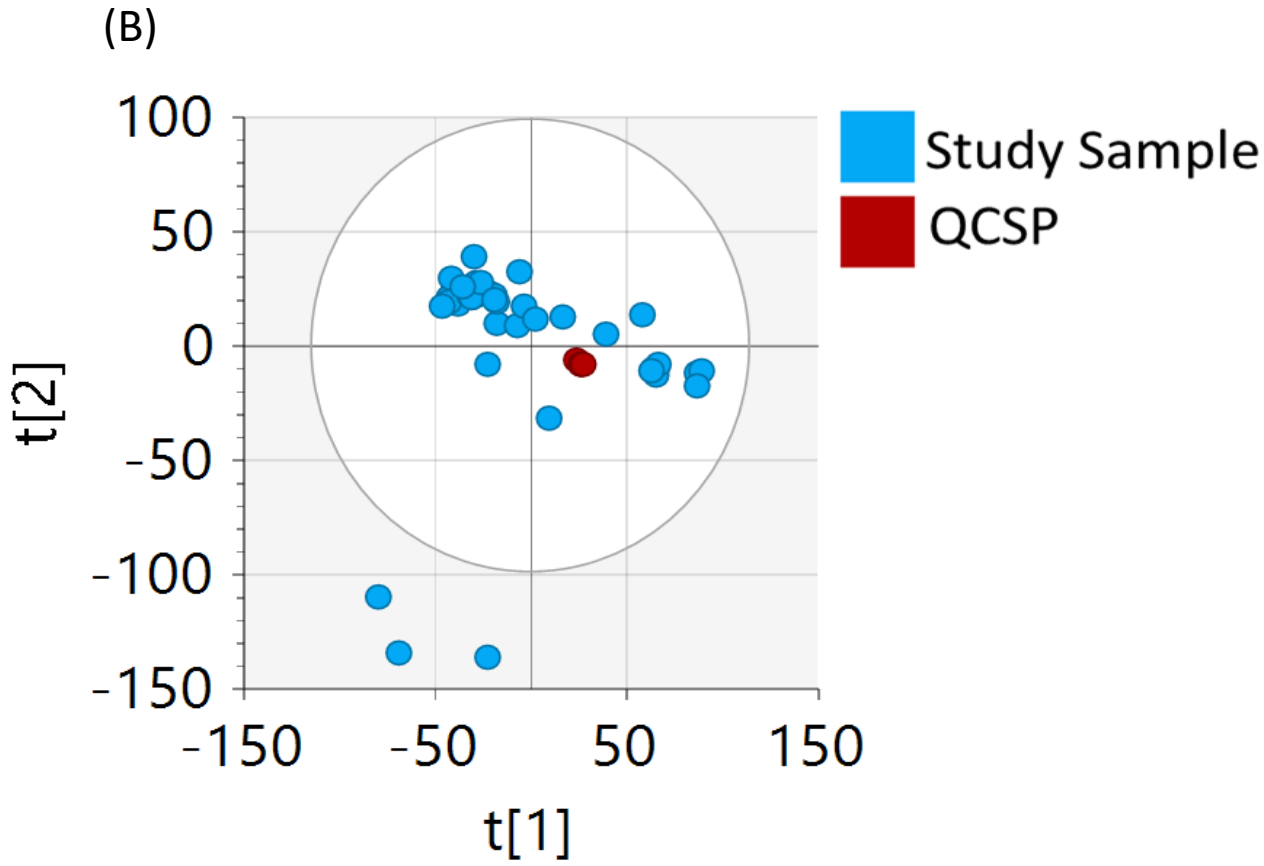

R2X: 0.604

Supplemental Figure S2

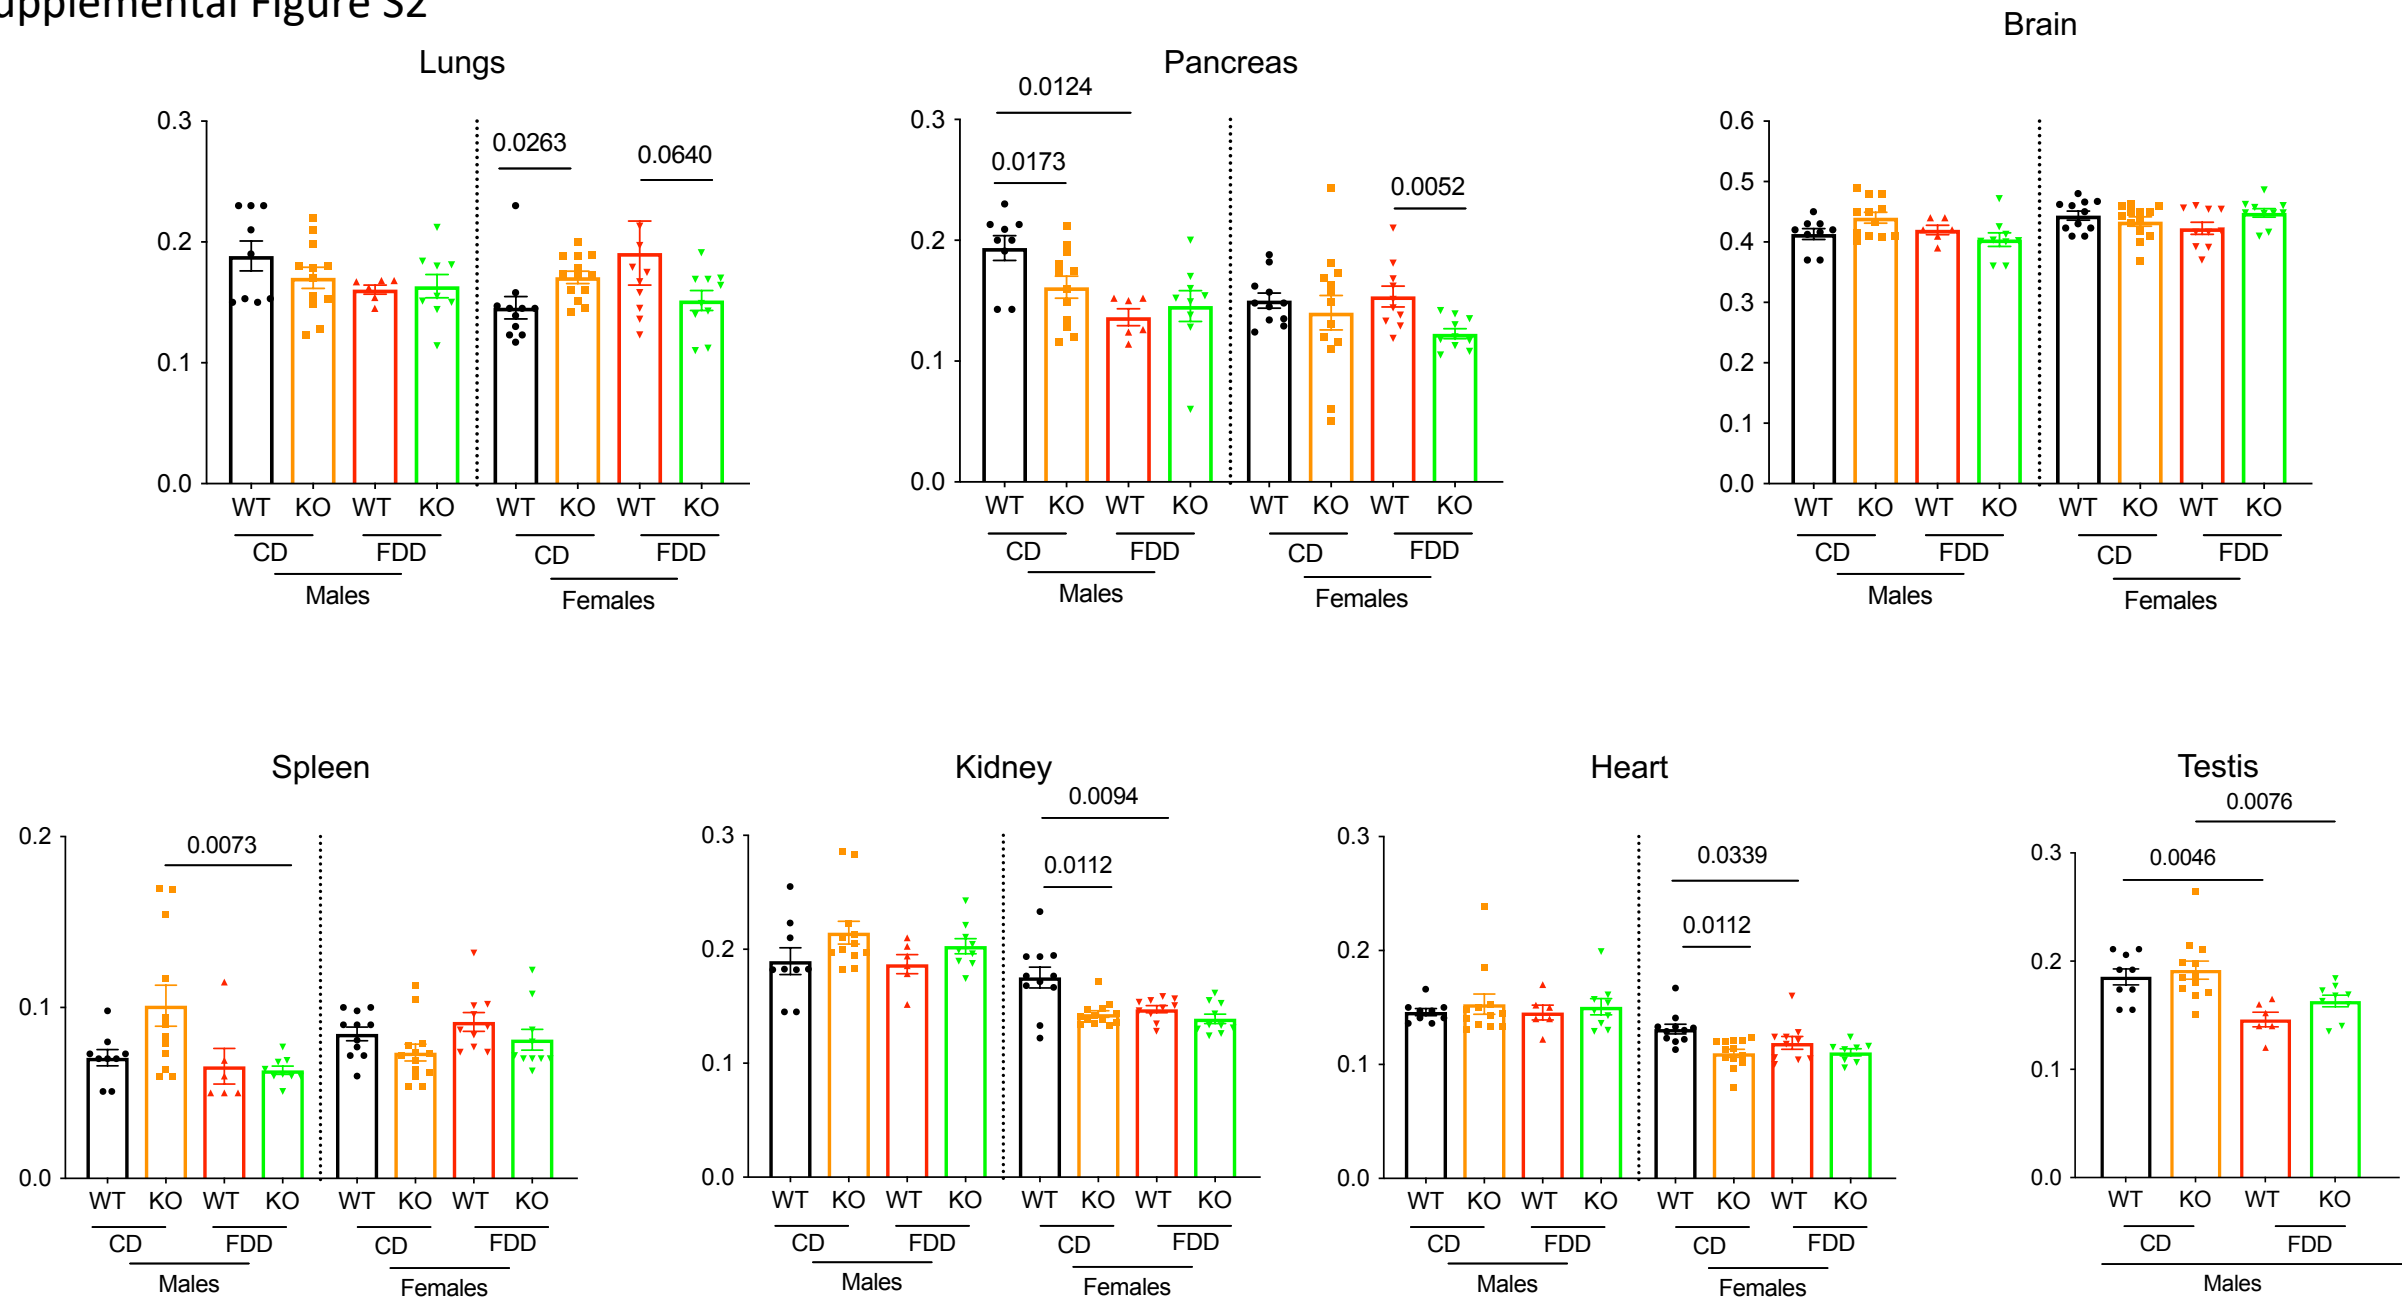

Supplemental Figure S3

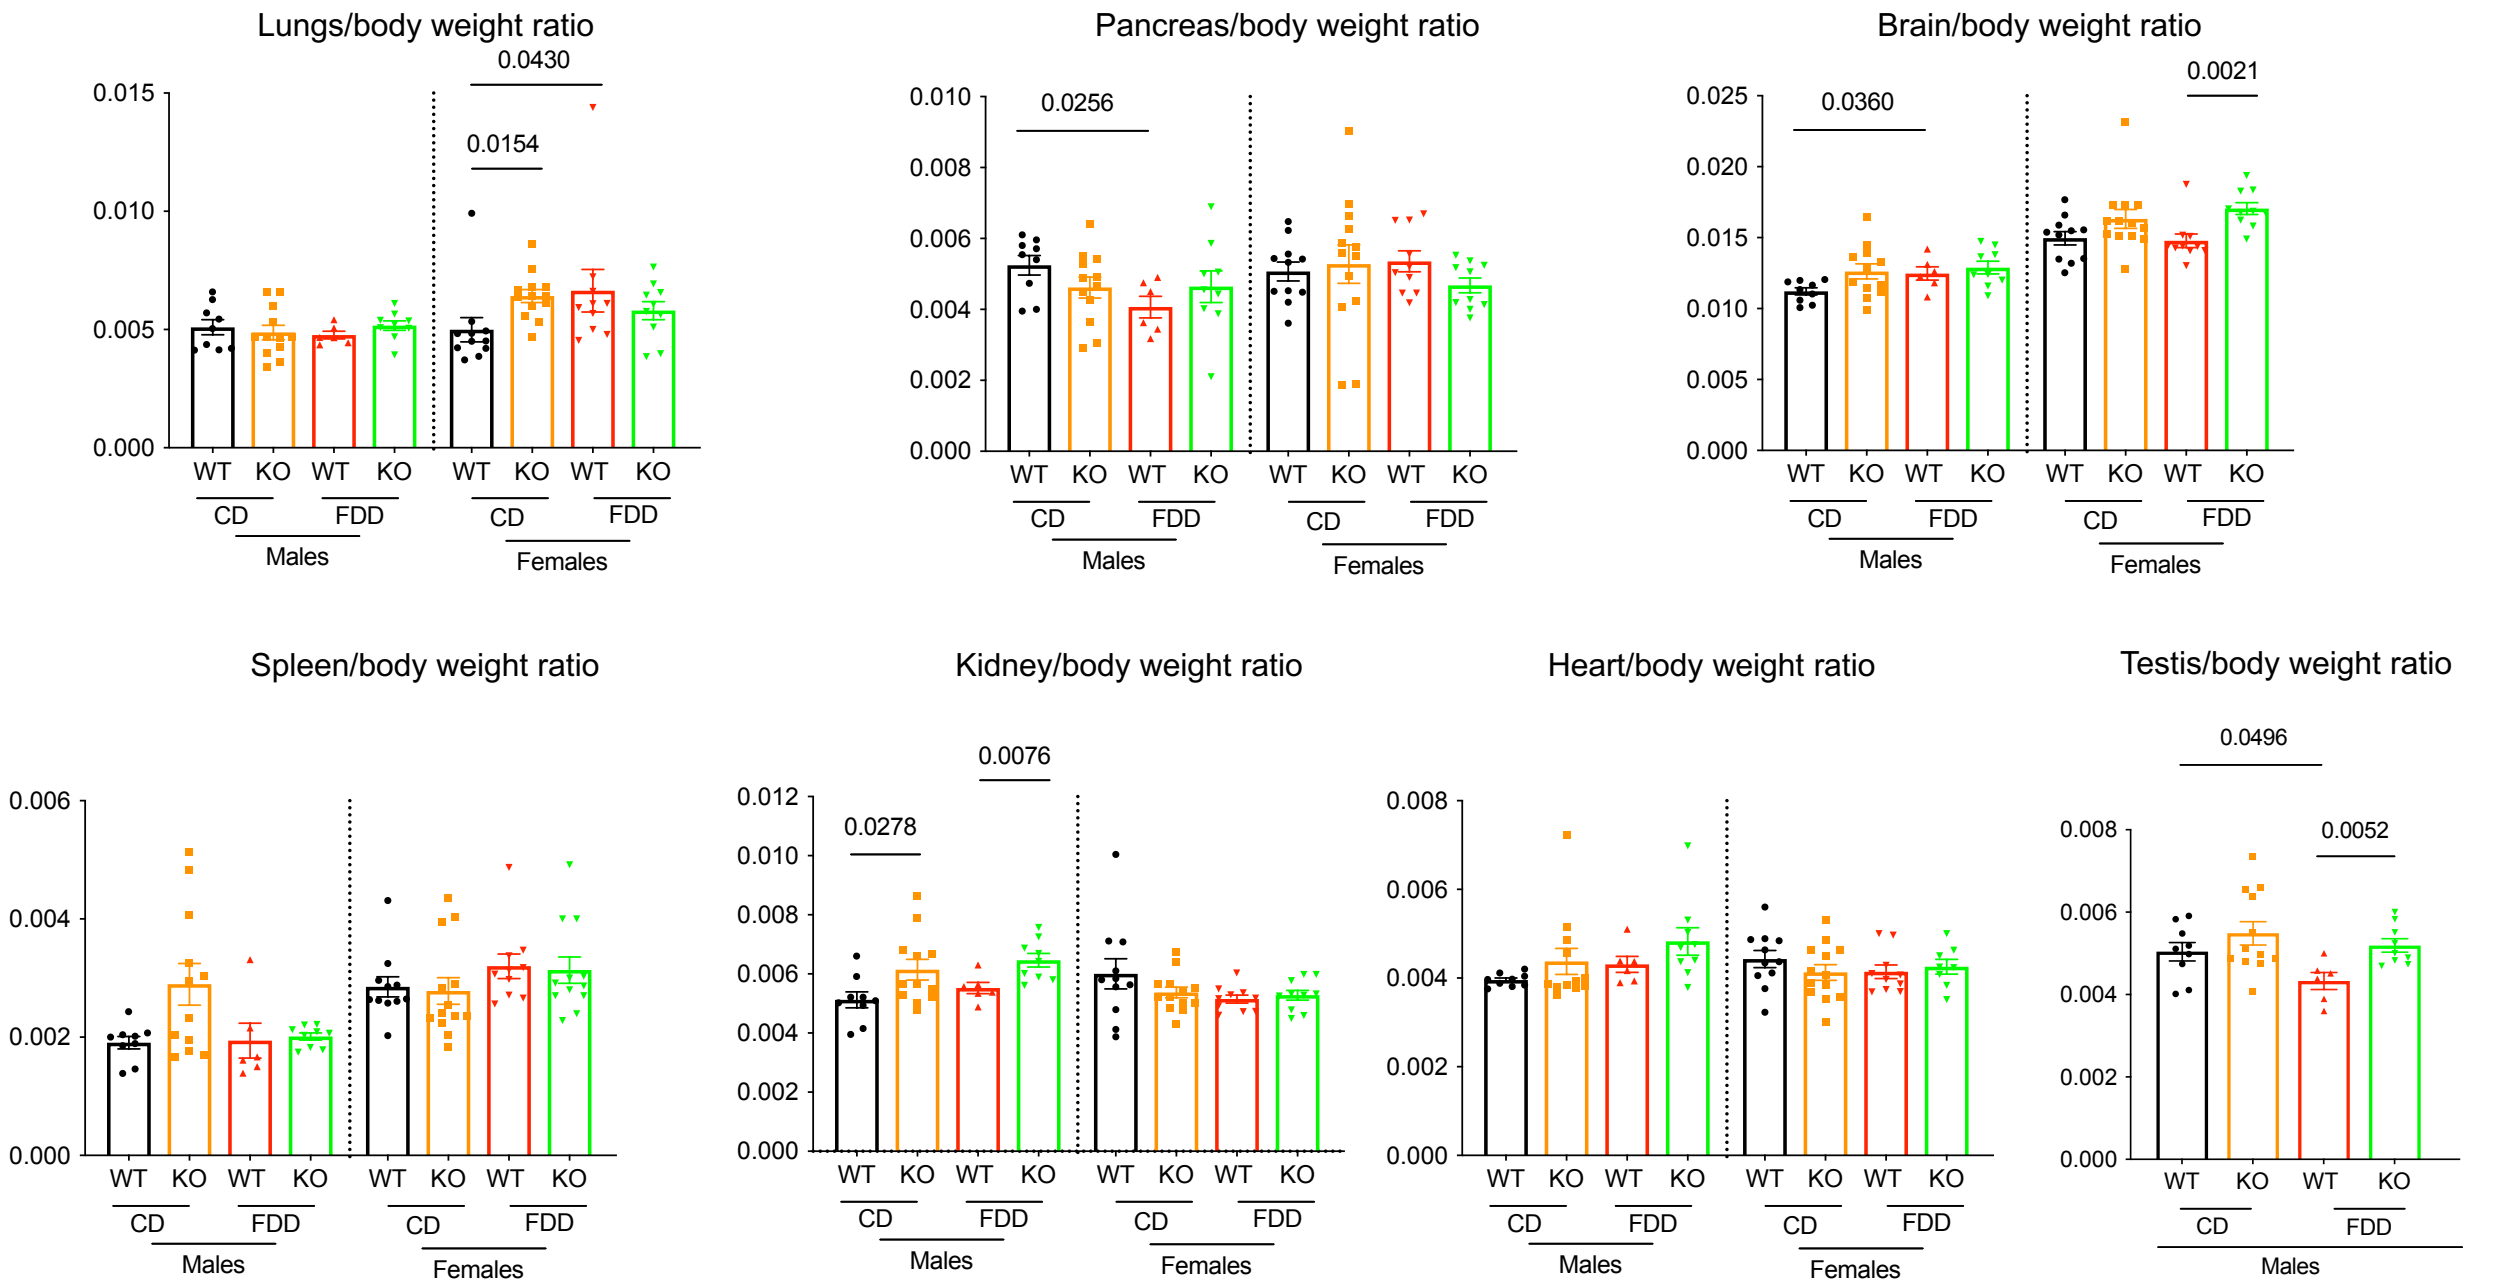

Supplemental Table S1:

| Primers | Sequence                          | Size(bp) |
|---------|-----------------------------------|----------|
| WT-F    | 5'- CCGAAGGACCAAACTCTTTCC-3'      | 199 bp   |
| WT-R    | 5'- TCCTTACAGCCCTTTCCAGAG-3'      |          |
| Mut-F   | 5'- CACACCTCCCCCTGAACCTGAAA -3'   | 685 bp   |
| Mut-R   | 5'- AAGCTTCCTCTCTGTTCTACCCACAC-3' |          |
