# Supplementary material for: Sex-Specific Metabolic Effects of Dietary Folate Withdrawal in Wild-Type and Aldh1l1 Knockout Mice
Source: Metabolites. 2022 May 18;12(5):454. doi: 10.3390/metabo12050454 (PMC9143804; doi:10.3390/metabo12050454)
Supplement: Supplementary file 1 [file metabolites-12-00454-s001.zip]

Archive with 6 entries (6 files):
- Supplemental Table S2.xlsx
- Supplemental Table S3.xlsx
- Supplementary file S1.pdf
- Supplementary file S2.pdf
- Supplementary file S3.pdf
- Supplementary file S4.pdf
