# Supplementary material for: Sex-Specific Metabolic Effects of Dietary Folate Withdrawal in Wild-Type and Aldh1l1 Knockout Mice
Source: Metabolites. 2022 May 18;12(5):454. doi: 10.3390/metabo12050454 (PMC9143804; doi:10.3390/metabo12050454)
Supplement: Supplementary file 1 [file metabolites-12-00454-s001.zip › Supplemental Table S2.xlsx]

## Sheet: Sheet1
Table S2. Pathways with P-value < 0.1 for Liver Sample Pairwise Comparisons
Pathway	Males WT - CD vs FD	Male KO - CD vs FD	Male CD - WT vs KO	Male FD - WT vs KO		Female WT - CD vs FD	Female KO - CD vs FD	Female CD - WT vs KO	Female FD - WT vs KO
Alanine, aspartate and glutamate metabolism		4.4166e-05		0.079424				0.012996	0.0011357
Amino sugar and nucleotide sugar metabolism	0.0050526		0.064453			0.032301			0.000986
Butanoate metabolism	0.022004	0.0054925					0.064167		0.031236
Folate biosynthesis		0.040839	0.02008			0.0057438		0.059033
Glycerophospholipid metabolism		0.0093039	0.00028877			2.3852e-06		0.0044419
Pentose phosphate pathway	0.020058	0.099083	0.030967					0.0069217
Aminoacyl-tRNA biosynthesis		0.040188		0.055525			0.0043483
Primary bile acid biosynthesis				0.001671		0.047968			0.027166
Valine, leucine and isoleucine biosynthesis				0.083733		0.071868	0.041161
Ascorbate and aldarate metabolism		0.016747	0.010629
Galactose metabolism						0.065634	0.057293
Glycerolipid metabolism						0.029141		0.0063342
Histidine metabolism		0.092361							0.059442
One carbon pool by folate				0.0042069			0.041161
Pentose and glucuronate interconversions	0.044976	0.0039715
Phenylalanine, tyrosine and tryptophan biosynthesis		0.023981					0.023767
Pyrimidine metabolism		0.020006		0.00098909
Tryptophan metabolism			0.022527				0.00058894
Arginine and proline metabolism							0.0097256
Biosynthesis of unsaturated fatty acids								0.044213
Citrate cycle (TCA cycle)		0.083221
Cysteine and methionine metabolism									0.010107
D-Glutamine and D-glutamate metabolism		0.0056154
Ether lipid metabolism							0.008053
Fructose and mannose metabolism									0.050504
Glutathione metabolism							0.067091
Glycine, serine and threonine metabolism									0.0077852
Glycolysis / Gluconeogenesis								0.026739
Glycosylphosphatidylinositol (GPI)-anchor biosynthesis				0.010604
Lipoic acid metabolism			0.085443
Lysine degradation							0.0040889
Mucin type O-glycan biosynthesis				0.077172
Pantothenate and CoA biosynthesis		0.058277
Porphyrin and chlorophyll metabolism									0.087109
Propanoate metabolism									0.012953
Pyruvate metabolism									0.011992
Sphingolipid metabolism									0.071611
Starch and sucrose metabolism							0.050359
Taurine and hypotaurine metabolism									0.040169
Terpenoid backbone biosynthesis								0.069865
Tyrosine metabolism						0.084591
Ubiquinone and other terpenoid-quinone biosynthesis			0.075897
Valine, leucine and isoleucine degradation							0.022537
total number of pathways with p < 0.1	4	14	8	8		8	13	8	13
P-values are only displayed if they are < 0.1
