# Supplementary material for: Sex-Specific Metabolic Effects of Dietary Folate Withdrawal in Wild-Type and Aldh1l1 Knockout Mice
Source: Metabolites. 2022 May 18;12(5):454. doi: 10.3390/metabo12050454 (PMC9143804; doi:10.3390/metabo12050454)
Supplement: Supplementary file 1 [file metabolites-12-00454-s001.zip › Supplemental Table S3.xlsx]

## Sheet: Sheet1
Table S3. Pathways with P-value < 0.1 for Plasma Sample Pairwise Comparisons
Pathway	Male WT - CD vs FD	Male KO - CD vs FD	Male CD - WT vs KO	Male FD - WT vs KO		Female WT - CD vs FD	Female KO - CD vs FD	Female CD - WT vs KO	Female FD - WT vs KO
Aminoacyl-tRNA biosynthesis	0.042123	0.019414	0.070047	0.021257
Porphyrin and chlorophyll metabolism	0.038713					0.03393		0.039043	0.073378
Phenylalanine metabolism		0.00095745	0.048492	0.091739
Steroid hormone biosynthesis	0.041586		0.0022555				0.00055327
Tryptophan metabolism		0.016799				0.0015687		5.9419e-06
Amino sugar and nucleotide sugar metabolism	0.021544			0.061778
D-Arginine and D-ornithine metabolism						0.0050196		0.030765
Folate biosynthesis	0.086266			0.081921
Lysine degradation	0.013838					0.03393		0.039043
Phenylalanine, tyrosine and tryptophan biosynthesis		0.00070843		0.022619
Primary bile acid biosynthesis			0.0022886						0.020734
alpha-Linolenic acid metabolism	0.08649
Alanine, aspartate and glutamate metabolism				0.027648
Arachidonic acid metabolism							0.00083582
Arginine and proline metabolism						0.034767
Biosynthesis of unsaturated fatty acids							0.00019566
Butanoate metabolism				0.072006
D-Glutamine and D-glutamate metabolism				0.0012945
Ether lipid metabolism	0.042922
Fatty acid biosynthesis							0.0073914
Glutathione metabolism								0.03471
Glycine, serine and threonine metabolism							0.045716
Glycosaminoglycan biosynthesis - chondroitin sulfate / dermatan sulfate								0.030765
Glycosaminoglycan biosynthesis - heparan sulfate / heparin								0.030765
Inositol phosphate metabolism	0.066091
Linoleic acid metabolism		0.0026413
Nitrogen metabolism				0.010226
One carbon pool by folate							0.0026054
Pentose and glucuronate interconversions		0.012234
Phosphonate and phosphinate metabolism		0.0036372
Purine metabolism									0.001237
Retinol metabolism							0.016654
Starch and sucrose metabolism	0.060106
Synthesis and degradation of ketone bodies	0.084688
Tyrosine metabolism						0.041231
Valine, leucine and isoleucine biosynthesis				0.091892
Total number of pathways with p<0.1	11	7	4	10		6	7	7	3
P-values are only displayed if they are < 0.1
