# Supplementary figures and images for: Sex-Specific Metabolic Effects of Dietary Folate Withdrawal in Wild-Type and Aldh1l1 Knockout Mice
Source: MDPI journal article supplement (doi:10.3390/metabo12050454), 2022-05-18

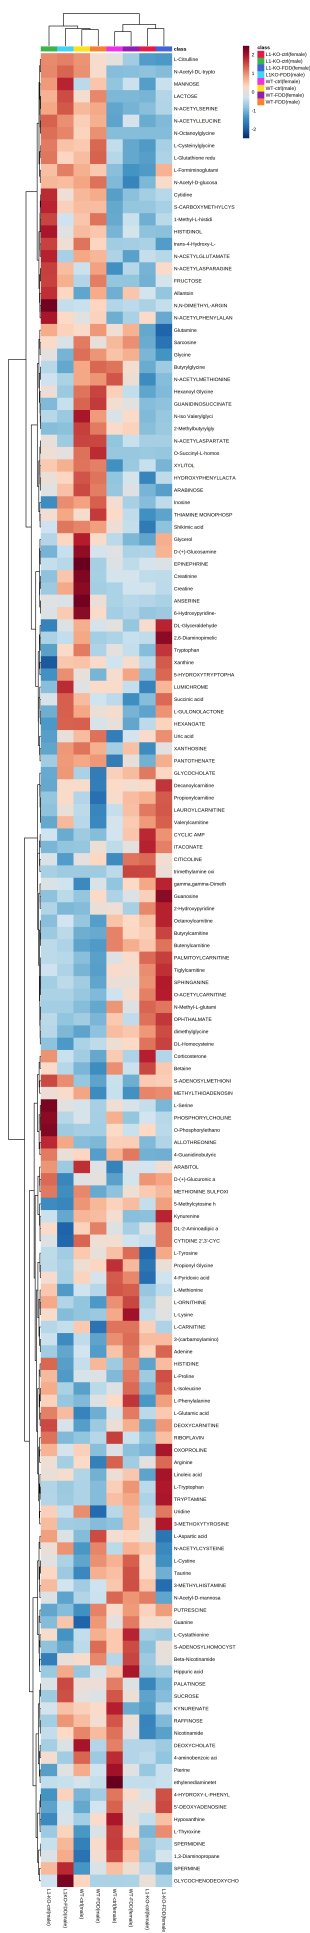

Supplement: s1 [file s1]
